# Supplementary material for: A Self-Healing Gel with an Organic–Inorganic Network Structure for Mitigating Circulation Loss
Source: MDPI journal article supplement (doi:10.3390/gels10020093), 2024-01-25
Supplement: s1 [file s1]

Article

# A Self-Healing Gel with an Organic–Inorganic Network Structure for Mitigating Circulation Loss

Cheng Wang <sup>1,2</sup>, Jinsheng Sun <sup>1,2,\*</sup>, Yifu Long <sup>2,\*</sup>, Hongjun Huang <sup>2</sup>, Juye Song <sup>3</sup>, Ren Wang <sup>2</sup>, Yuanzhi Qu <sup>2</sup> and Zexing Yang <sup>2</sup>

<sup>1</sup> College of Chemistry and Chemical Engineering, Southwest Petroleum University, Chengdu 610500, China; wangchengscc@163.com

<sup>2</sup> CNPC Engineering Technology R&D Company Limited, Beijing 102206, China; huanghj\_dri@cnpc.com.cn (H.H.); wangrdr@cnpc.com.cn (R.W.); quyz\_dri@cnpc.com.cn (Y.Q.); yangzxdri@cnpc.com.cn (Z.Y.)

<sup>3</sup> CNPC Great Wall Drilling Engineering Company Limited, Beijing 102206, China; songjy.gwdc@cnpc.com.cn

\* Correspondence: sunjsdri@cnpc.com.cn (J.S.); longyfdr@cnpc.com.cn (Y.L.)

Figs. S1 through S6

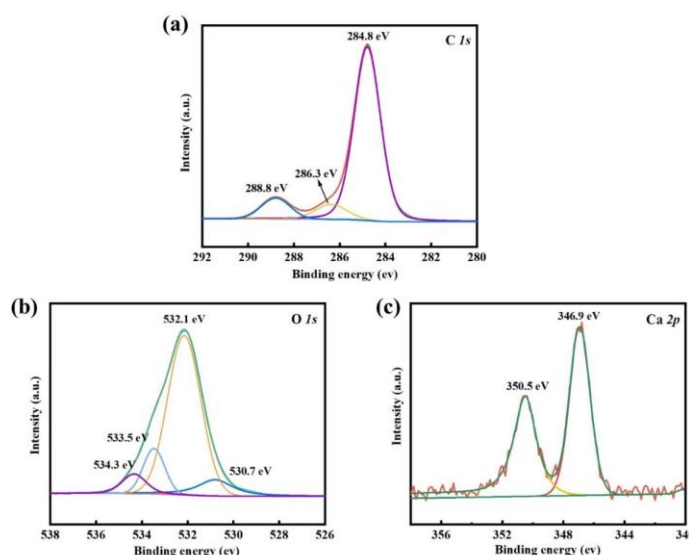

**Figure S1.** High-resolution XPS spectra for AC<sub>6</sub>L<sub>3</sub>: (a) C 1s, (b) O 1s and Ca 2p.

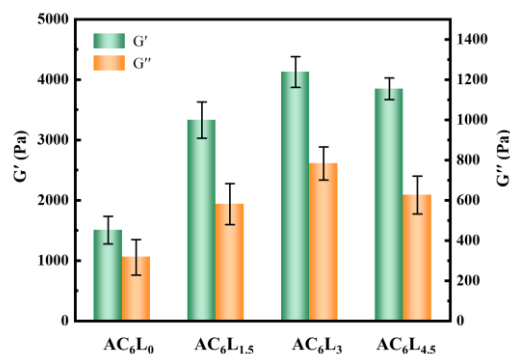

**Figure S2.** G' and G'' of self-healed gels with different LDH additions.

**Citation:** Wang, C.; Sun, J.; Long, Y.; Huang, H.; Song, J.; Wang, R.; Qu, Y.; Yang, Z. A Self-Healing Gel with an Organic–Inorganic Network Structure for Mitigating Circulation Loss. *Gels* **2024**, *10*, 93. <https://doi.org/10.3390/gels10020093>

Academic Editor: Jordi Puiggali

Received: 11 January 2024

Revised: 22 January 2024

Accepted: 23 January 2024

Published: 25 January 2024

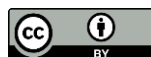

**Copyright:** © 2024 by the authors. Licensee MDPI, Basel, Switzerland. This article is an open access article distributed under the terms and conditions of the Creative Commons Attribution (CC BY) license (<https://creativecommons.org/licenses/by/4.0/>).

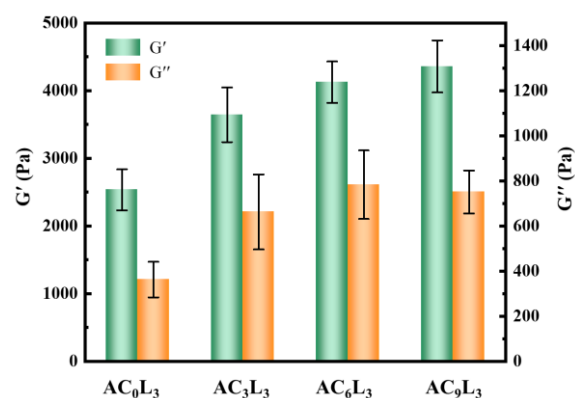

Figure S3.  $G'$  and  $G''$  of self-healed gels with different  $\text{CaCl}_2$  additions.

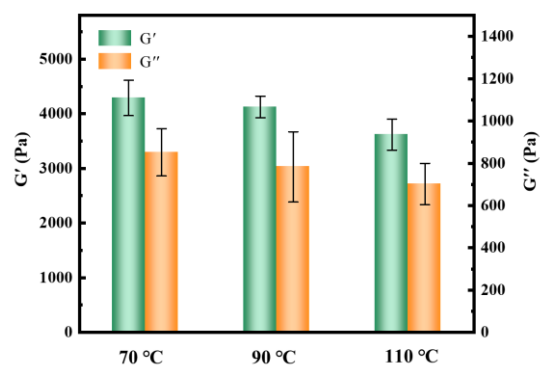

Figure S4.  $G'$  and  $G''$  of  $\text{AC}_6\text{L}_3$  self-healed gels at different temperatures.

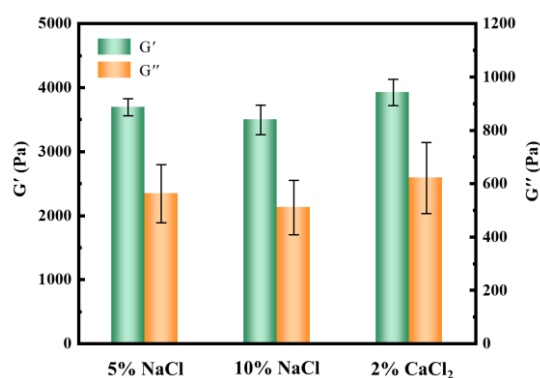

Figure S5.  $G'$  and  $G''$  of  $\text{AC}_6\text{L}_3$  self-healed gels at brines.

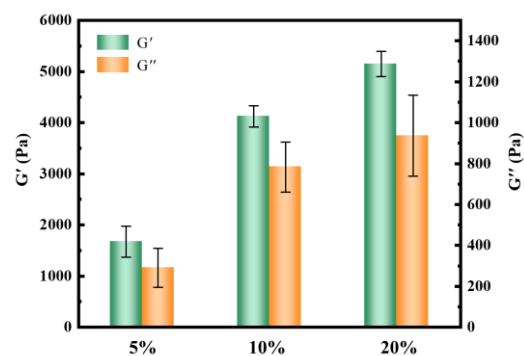

Figure S6.  $G'$  and  $G''$  of self-healed gels with different  $\text{AC}_6\text{L}_3$  particle concentrations.

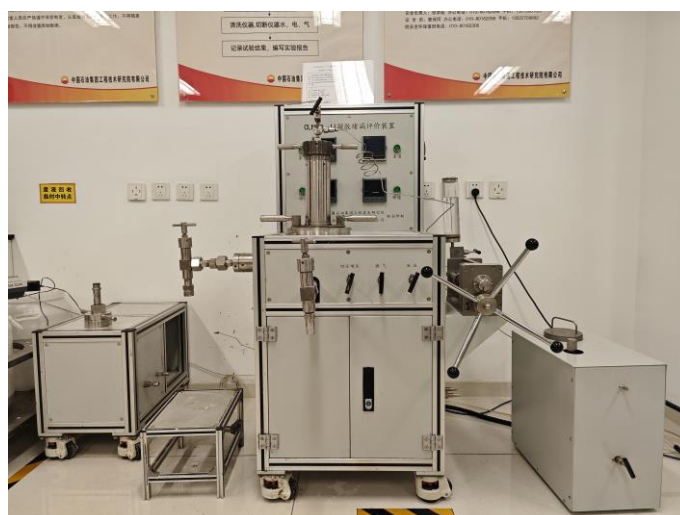

**Figure S7.** The physical diagram of the plugging experimental device.
